# Supplementary material
Source: PubMed Central journal article supplement (PMC4119029)
Supplement: supp_pp.114.241877_241877revsupp.pdf [file supp_pp.114.241877_241877revsupp.pdf]

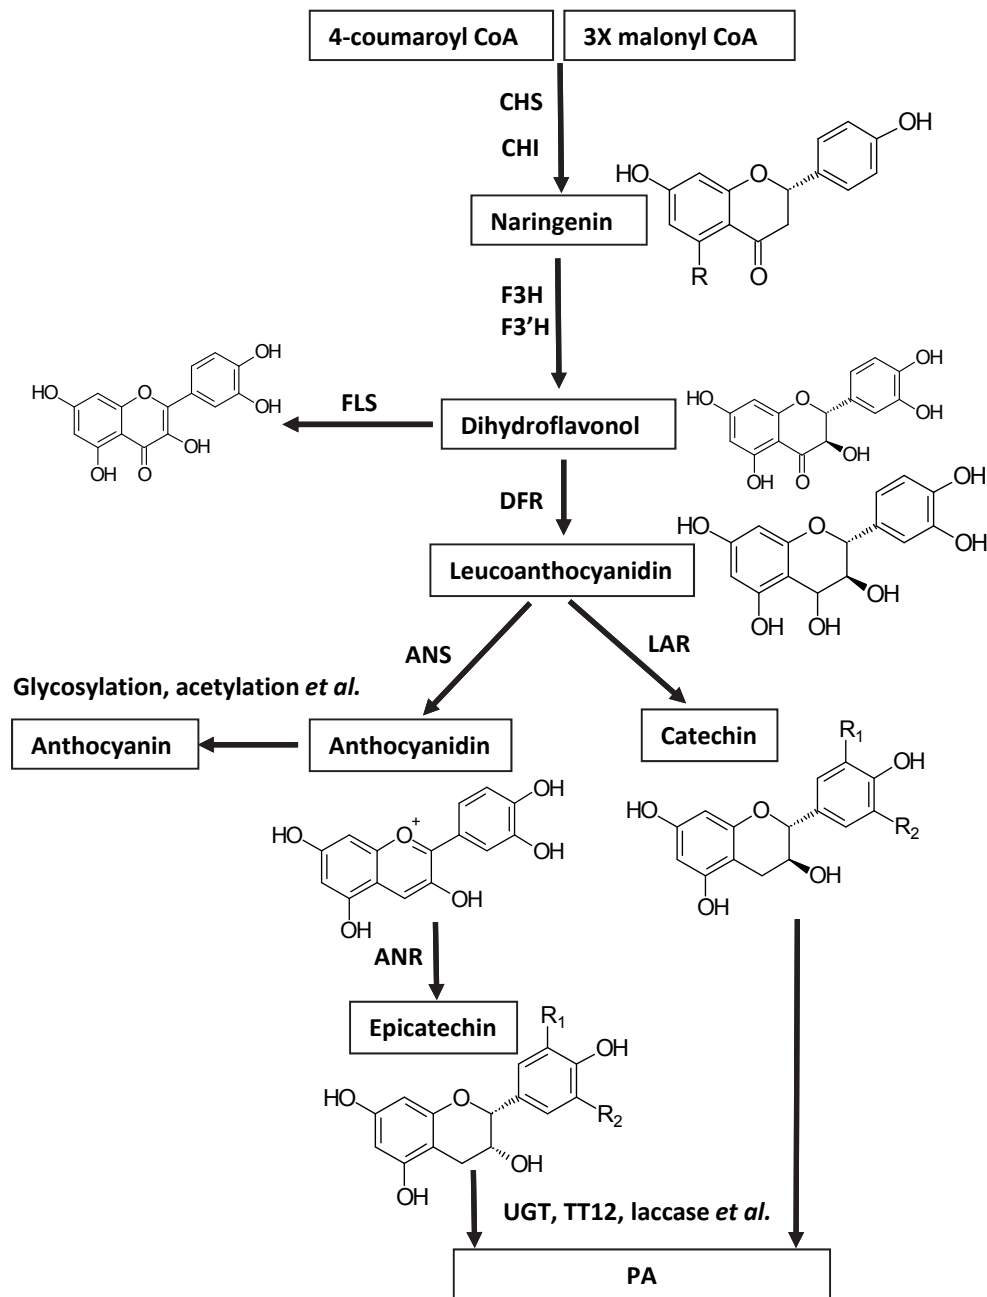

**Figure S1.** Biosynthesis pathway of PA.

CHS: Chalcone synthase, CHI: Chalcone isomerase, F3H: Flavanone 3 hydroxylase, F3'H: Flavonoid 3' hydroxylase, DFR: dihydroflavonol 4-reductase, FLS: Flavonol synthase, ANS: anthocyanidin synthase, LAR: Leucoanthocyanidin reductase, ANR: anthocyanidin reductase, UGT: UDP glucosyltransferase, TT12: transparent testa 12

```

BNLGH1233 1 -----MRNPTKKDN--VGTKTTPCCSKVGLKRGPWTPPEDELLSN
MtMYB5 1 MMNLSSTDDQDKSETTNSNSNPNPKKQK--T-TTTPCCSKVGLKRGPWTPPEDEVLSE
PH4 1 -----MRTPSSSST--TSNKVTPCCSKVGLKRGPWTPPEDELLTN
VvMyb5a 1 -----MRNPASAST----SKTPCCSKVGLKRGPWTPPEDELLAN
VvMyb5b 1 -----MRNPASASAPPSSSKTPCCSKVGLKRGPWTPPEDELLAN
AtMYB5 1 -----MNSCGGKKP--VSKKTPCCSKVGLKRGPWTPPEDELLVS
DkMYB4 1 -----MGRAPCCSKVGLKRGPWTPPEDELLTK
consensus 1 .....*****.*****.*****.*****

R2
BNLGH1233 39 YINKEGEGRWRTLPKFRAGLLRCGKSCRLRWMNYLRPSVKRGOIAPDEEDLILRLHRLLLGN
MtMYB5 58 YIKKEGEGRWRTLPKFRAGLLRCGKSCRLRWMNYLRPSVKRGOIAPDEEDLILRLHRLLLGN
PH4 39 YINKEGEGRWRTLPKFRAGLLRCGKSCRLRWMNYLRPSVKRGOIAPDEEDLILRLHRLLLGN
VvMyb5a 36 YIKKEGEGRWRTLPKFRAGLLRCGKSCRLRWMNYLRPSVKRGOIAPDEEDLILRLHRLLLGN
VvMyb5b 41 YIKKEGEGRWRTLPKFRAGLLRCGKSCRLRWMNYLRPSVKRGOIAPDEEDLILRLHRLLLGN
AtMYB5 39 YIKKEGEGRWRTLPKFRAGLLRCGKSCRLRWMNYLRPSVKRGOIAPDEEDLILRLHRLLLGN
DkMYB4 28 YIQVHGGEGWRSLPKFRAGLLRCGKSCRLRWMNYLRPSVKRGOIAPDEEDLILRLHRLLLGN
consensus 61 .....*****.*****.*****.*****.*****.*****.*****.*****

R3 C1
BNLGH1233 99 RWSLIAGRIPGRTDNEIKNYWNTHLSKKLISQCIDPRTHKPLN-PQQLS-----
MtMYB5 118 RWSLIAGRIPGRTDNEIKNYWNTHLSKKLISQCIDPRTHKPLNPNPSSSIIPTNTH--
PH4 99 RWSLIAGRIPGRTDNEIKNYWNTHLSKKLISQCIDPRTHKPLNPNPSSSDDITNKLA--
VvMyb5a 96 RWSLIAGRIPGRTDNEIKNYWNTHLSKKLISQCIDPRTHKPLNPNPSPDVNAPVS--K
VvMyb5b 101 RWSLIAGRIPGRTDNEIKNYWNTHLSKKLISQCIDPRTHKPLNPNPSSVDVKASSKAK
AtMYB5 99 RWSLIAGRIPGRTDNEIKNYWNTHLSKKLISQCIDPRTHKPLDANNIHKPEEVSGG--
DkMYB4 88 RWSLIAGRIPGRTDNEIKNYWNTHLSKKLISQCIDPRTHKPLDSDSHVQEPKKRSSNKKQK
consensus 121 .....*****.*****.*****.*****.*****.*****.*****.*****

BNLGH1233 147 ---PSPFSLKPSFS-SSSSMAKPNPFPPLFVHVVNANKQNYDDGSNEDHQG--MIMN
MtMYB5 175 ---QTSTPFFAPSSSDHHHPITITNNEPDPSTQQAQCG-NLVNDVSAMDNHH--VLTN
PH4 156 ---SSPFP--SSSKANDLNPILSPTYISS-FQMEPELKGINTHPGEITSLDDQYQSNAILA
VvMyb5a 154 SIPNANPNPSSSRVGEIGSNHEVKEIESNENHKPEPNLDQYHS-PLAADSNNENWQSDGL
VvMyb5b 160 AVMNPNPNPSPSEKAAANKEAGNFKSD-----NQYQIGAAGNDGSANIQNSDGS
AtMYB5 156 ---QKYLEPFTSSHTDDTVNG-----SDGSKNSINVFVG
DkMYB4 148 NKSKENLDHTEKLVHNPKPFRIKSLASFSFSRDSSSFDWTTTTATATPSSGSSNHEGERG
consensus 181 .....*****.*****.*****.*****.*****.*****.*****.*****

C3
BNLGH1233 200 N-----DHYQQQDHDVVFSSFLNSLIN--ED-----
MtMYB5 229 NNRGDY----GDDNGNNNYGGDDVFTSFLDSLIN--DDAFAAHRSE-----
PH4 211 EYCDLNLIAVTIEEDVEMNCCTDDVFSFLNSLIN--EDMFAACNQSQ-----
VvMyb5a 213 VTGLQSTHGTSNDEDDIGFCNDDVFSFLNSLIN--EDVFGNHHHQQQQQQQQLQVVQ
VvMyb5b 211 GTGLRSSN--NEEDDDLNCCTDDVFSFLNSLIN--EDVFGQHHLQQQHHG-----
AtMYB5 190 EHGYS-----EDFGFCYDDKFSFLNSLINDVGDPEGN-----
DkMYB4 208 MLCNNGS--NGHEVGFFIGEDGSDHYHDDHMD--DSDLECCS-----
consensus 241 .....*****.*****.*****.*****.*****.*****.*****.*****

BNLGH1233 225 --DDALVSNLGLSQGWESTP-----FDQPK-----
MtMYB5 269 --NDPILSAAFPALWESPLMMTSTHNFTQNDGKAS-----
PH4 256 --TNGTFQDFDPMASSSTP-----SSDQYNF-----
VvMyb5a 271 QPSNVIAPLPHPAISVOATFSSSPRTVWEPAAALTSTSA--APLVHDQKHSMSPI--
VvMyb5b 259 --GLIAPGSDALISTSVQSFSGFTSWEAAAMTSTSVFSGIDHSKRFNDQPKRF
AtMYB5 222 ----TIFISQFLQMDCKDG-----IVGASSS-----LGHD-----
DkMYB4 247 --LEKLYEYLLQLKTEEDDQ-----GQLDSFABSL-----
consensus 301 .....*****.*****.*****.*****.*****.*****.*****.*****

```

**Figure S2.** Mt MYB5 is the homolog of At MYB5. Protein sequences of BNLGH1233, PH4 (AY973324), Vv MYB5a, Vv MYB5b, At MYB5, DkMYB4 and Mt MYB5 were aligned by the Muscle program (<http://www.ebi.ac.uk/Tools/msa/muscle/>). Multiple sequence alignment image was produced by Boxshade ([http://www.ch.embnet.org/software/BOX\\_form.html](http://www.ch.embnet.org/software/BOX_form.html)). Genbank accession numbers: At MYB5 (NP\_187963.1), Dk MYB4 (BAI49721.1), Vv MYB5a (NP\_001268108.1), Vv MYB5b (NP\_001267854.1), Mt MYB5 (XP\_003601609.1), PH4 (AAY51377.1), BNLGH1233 (AAK19611.1).



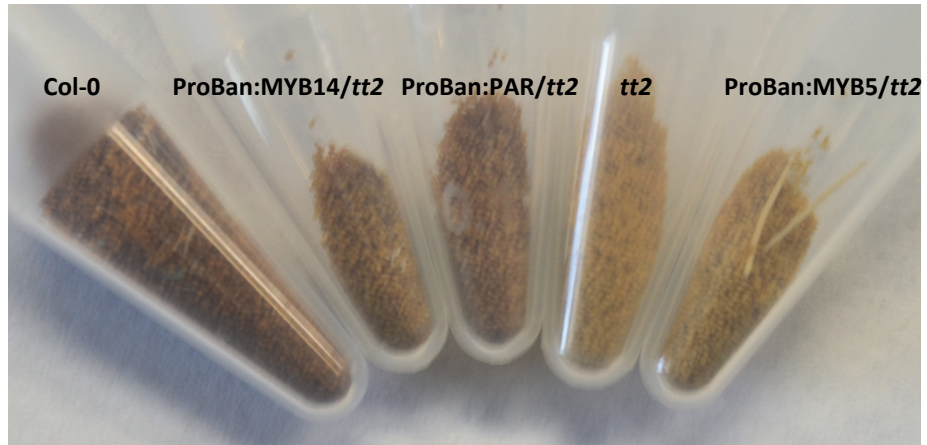

**Figure S4.** Genetic complementation of Arabidopsis *tt2* with Mt *Myb14*, Mt *Par* and Mt *Myb5*. Medicago *Myb14*, *Par* and *Myb5* were driven by Arabidopsis *Anr* (Banylus) promoter and used to complement Arabidopsis *tt2* mutant (Salk\_005260). Fifteen to twenty independent lines were observed and representative lines were presented. Mt MYB14 and Mt PAR clearly rescue the *tt2* phenotype, while Mt MYB5 does not.

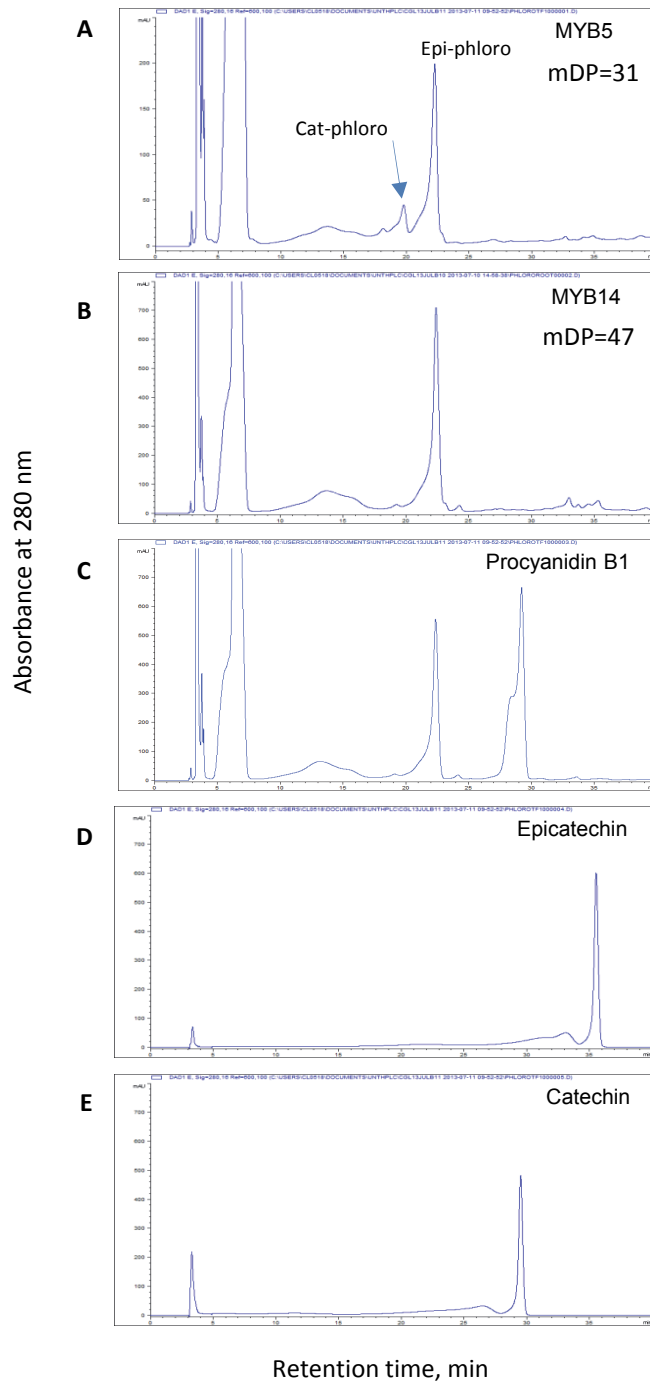

**Figure S5.** Phloroglucinolysis analysis of PAs in MYB5 and MYB14 over-expressing hairy roots. PAs purified by Sephadex LH20 resins were hydrolyzed by acidic phloroglucinol/mehanol solution. Hydrolyzed PA were analyzed by reverse phase HPLC. A, PAs purified from MtMYB5 over-expressing hairy roots. B, PAs purified from MtMYB14 over-expressing hairy roots. C, Procyanin B1 standard analyzed by phloroglucinolysis. D, Epicatechin standard. E, Catechin standard. mDP: mean degree of polymerization.

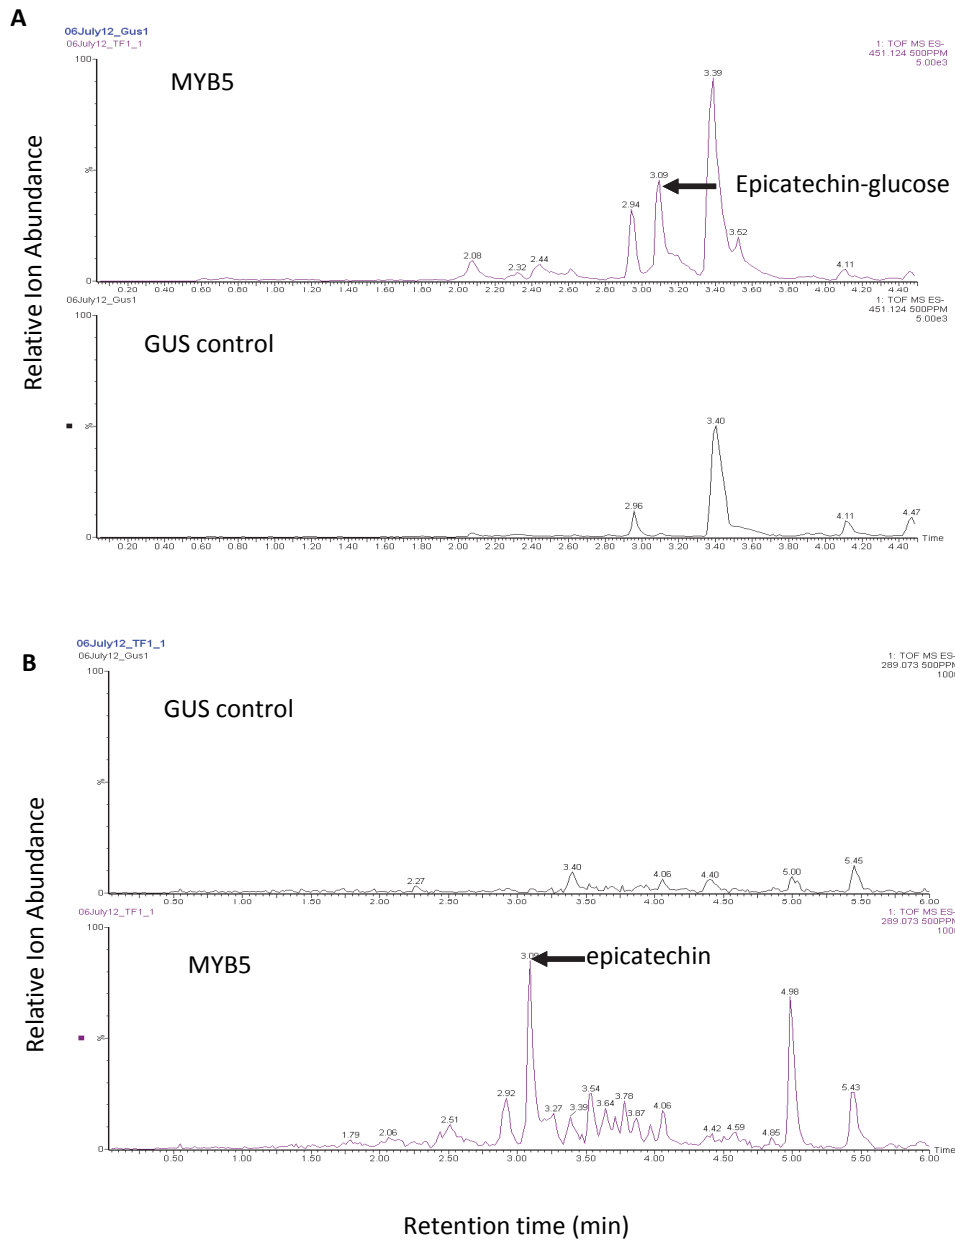

**Figure S6.** UPLC-MS detection of epicatechin and epicatechin-3'-O- glucoside ions in hairy roots over-expressing MYB5. A, epicatechin-3'-O- glucoside (m/z 451.124). B, epicatechin (m/z 289.073).

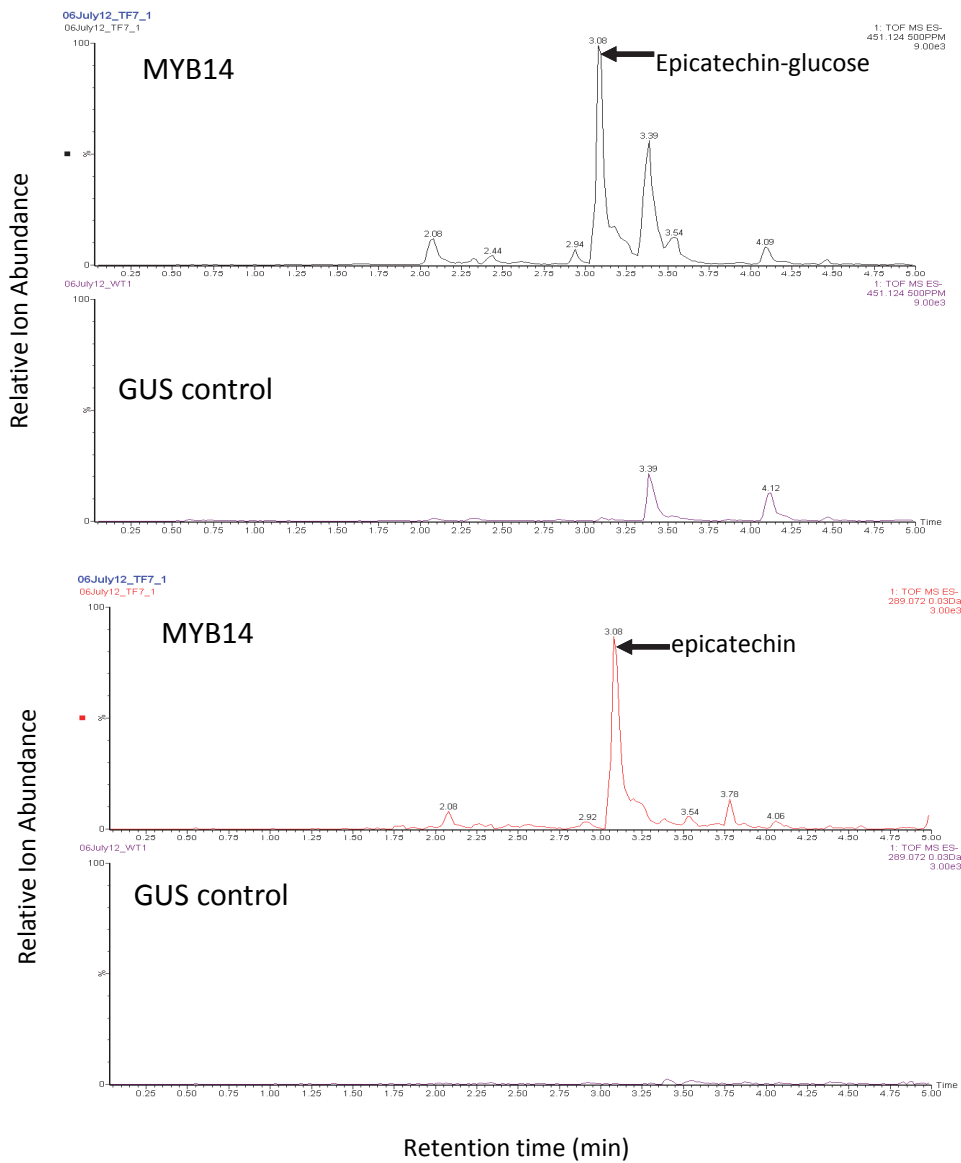

**Figure S7.** UPLC-MS detection of epicatechin and epicatechin-3'-O- glucoside ions in hairy roots over-expressing MYB14. A, epicatechin-3'-O- glucoside (m/z 451.124). B, epicatechin (m/z 289.073).

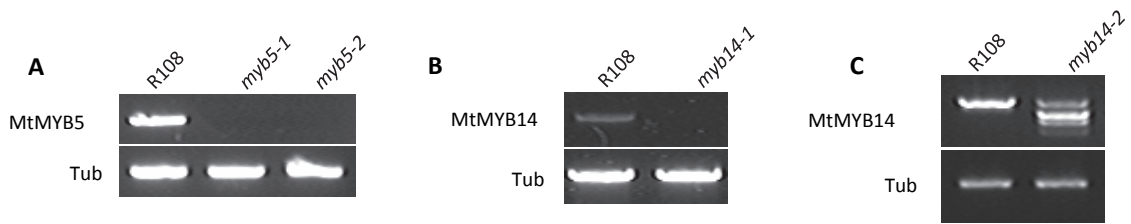

**Figure S8.** RT-PCR to detect MYB5 and MYB14 transcripts in *myb5* and *myb14* mutant seeds.

A, *myb5*. B, *myb14-1*. C, *myb14-2*.



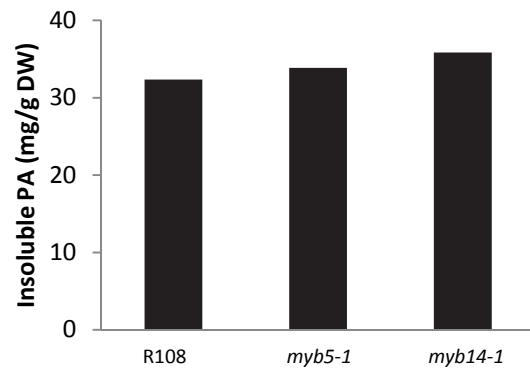

**Figure S9.** Butanol-HCl analysis of insoluble PA-like material in R108, *myb5* and *myb14* mutant seeds.

Insoluble PAs were hydrolyzed in butanol-HCl solution and levels expressed as procyanidin B1 equivalents.

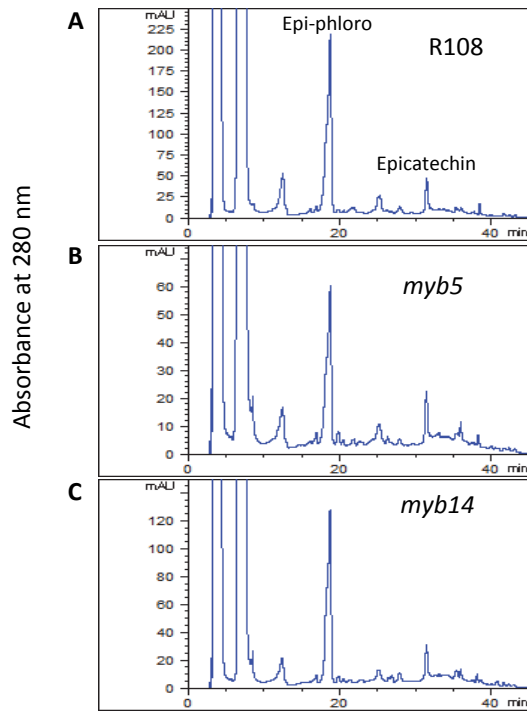

**Figure S10.** Phloroglucinolysis analysis of soluble PAs in the seeds of wild-type (R108), *myb5-1* and *myb14-1*.

PAs purified with Sephadex LH20 resin were hydrolyzed by acidic phloroglucinol/methanol solution. Hydrolyzed PAs were analyzed by reverse phase HPLC. A, PAs purified from R108 seeds. B, PAs purified from *mtmyb5* seeds. C, PAs purified from *myb14* seeds.

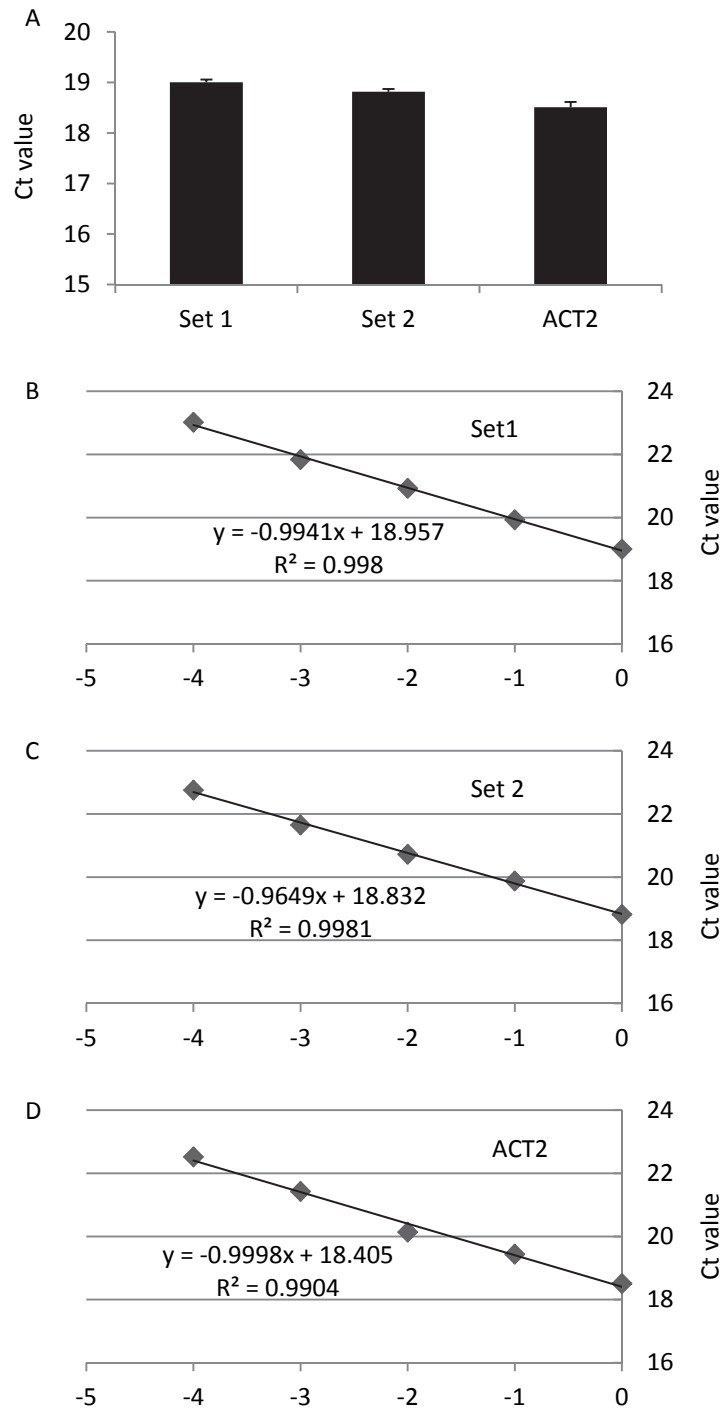

**Figure S11.** Measurement of MYB14 copy number in the *Medicago truncatula* genome by qPCR.

A, The Ct values of MYB14 determined by two sets of primers (Set 1 and Set 2, Supplemental Table 4) and reference ACT2 genes.

B, The amplification efficiency of primer set 1 determined by serial dilution of genomic DNA. Y-axis, Ct value. X-axis, log<sub>2</sub> value of dilution factors.

C, The amplification efficiency of primer set 2 determined by serial dilution of genomic DNA. Y-axis, Ct value. X-axis, log<sub>2</sub> value of dilution factors.

D, The amplification efficiency of primer pairs of ACT2 determined by serial dilution of genomic DNA. Y-axis, Ct value. X-axis, log<sub>2</sub> value of dilution factors.

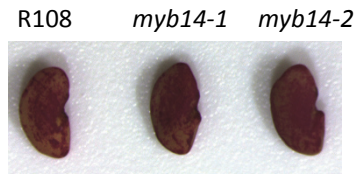

**Figure S12.** Ruthenium red staining showing that mucilage levels in *myb14* are similar to those in wild-type R108.
